# Supplementary material for: A novel fungal metabolite inhibits Plasmodium falciparum transmission and infection
Source: PubMed Central journal article supplement (PMC7992847; doi:10.1186/s13071-021-04677-7), 2021-03-24
Supplement: 13071_2021_4677_MOESM1_ESM.pdf [file 13071_2021_4677_MOESM1_ESM.pdf]

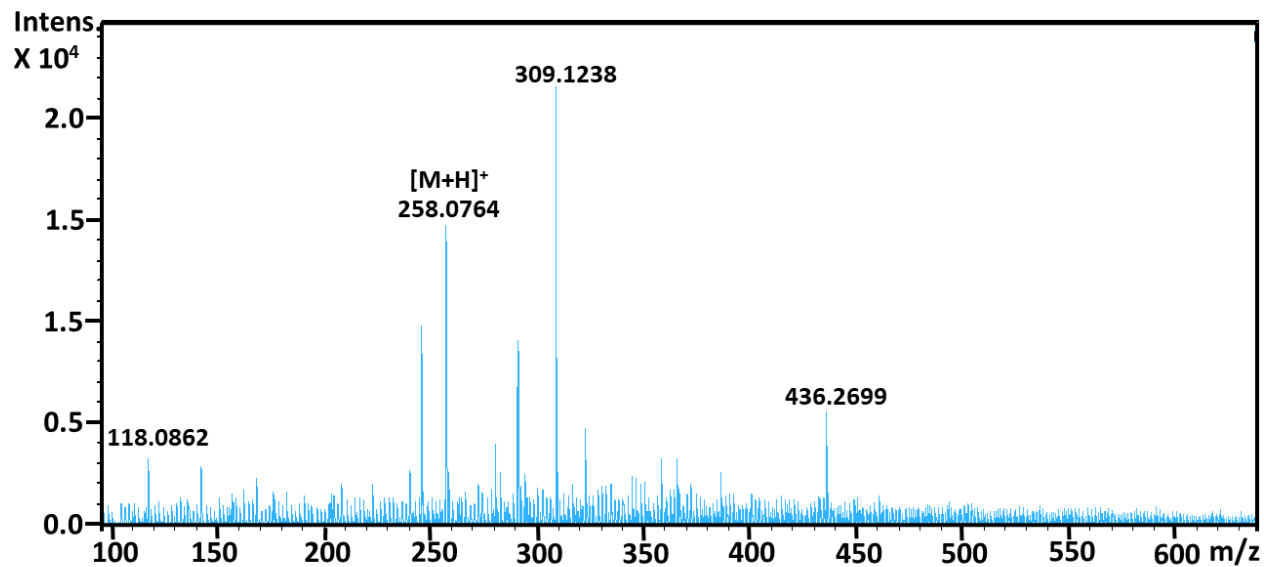

**Fig S1:** Identification of candidate compound through the mass spectrometry profile of pulixin, showing the mass of 258.0764, which matched the calculated mass.

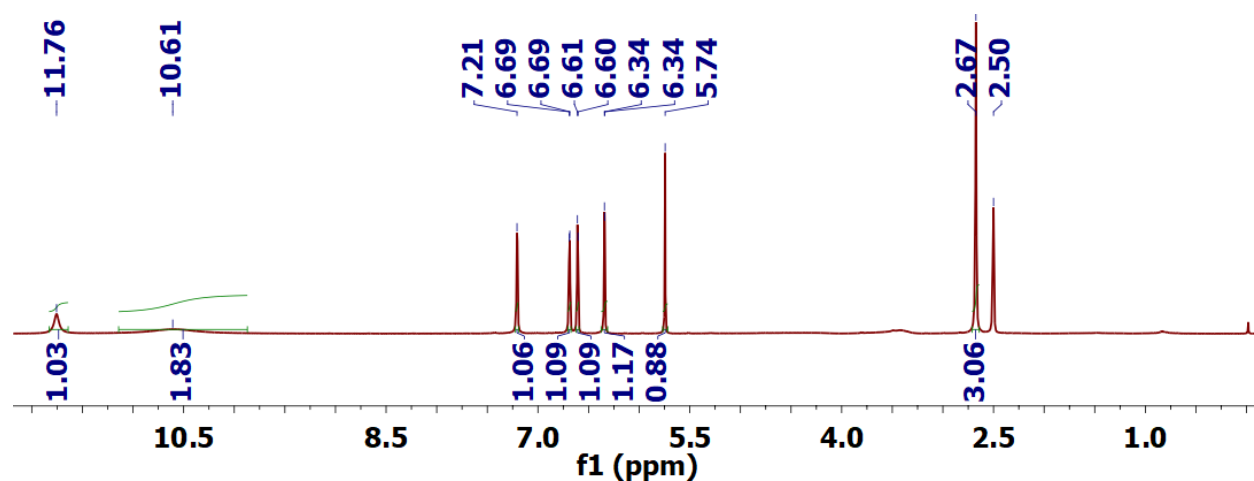

**Fig S2:** The <sup>1</sup>H-NMR profile of pulixin confirmed the structure of pulixin.

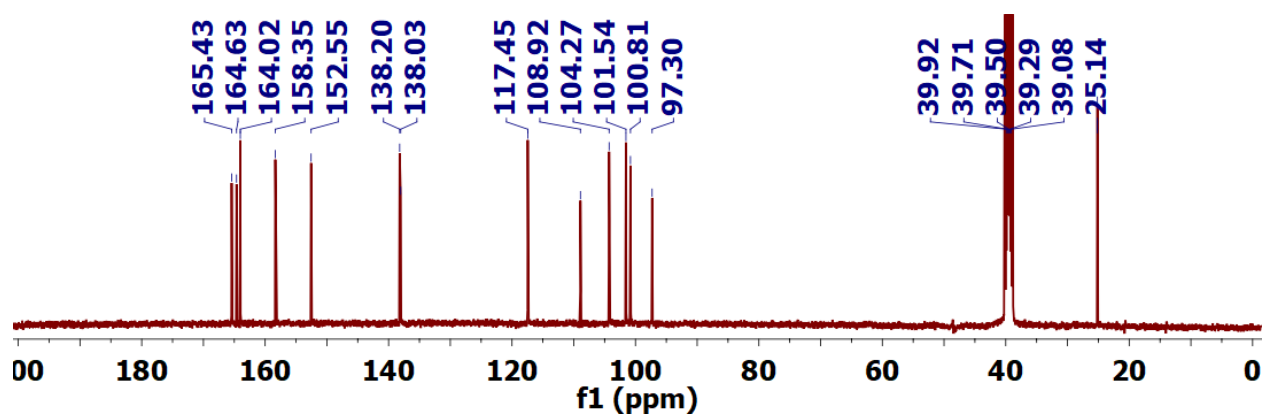

**Fig S3:** The <sup>13</sup>C-NMR profile of pulixin was consistent with the proposed structure.
